# Supplementary material
Source: Springer Nature journal article supplement (https://www.springermedizin.de/resource/supplementary/12997_2006_32_MOESM3_ESM.pdf/9623148)

**A**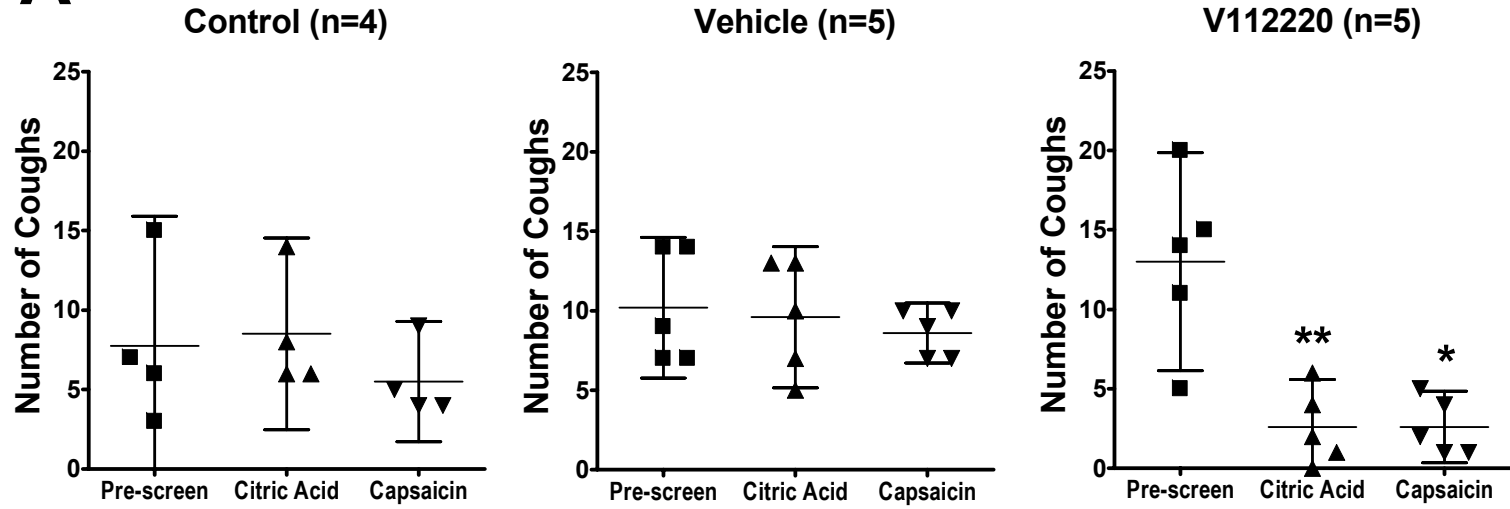**B**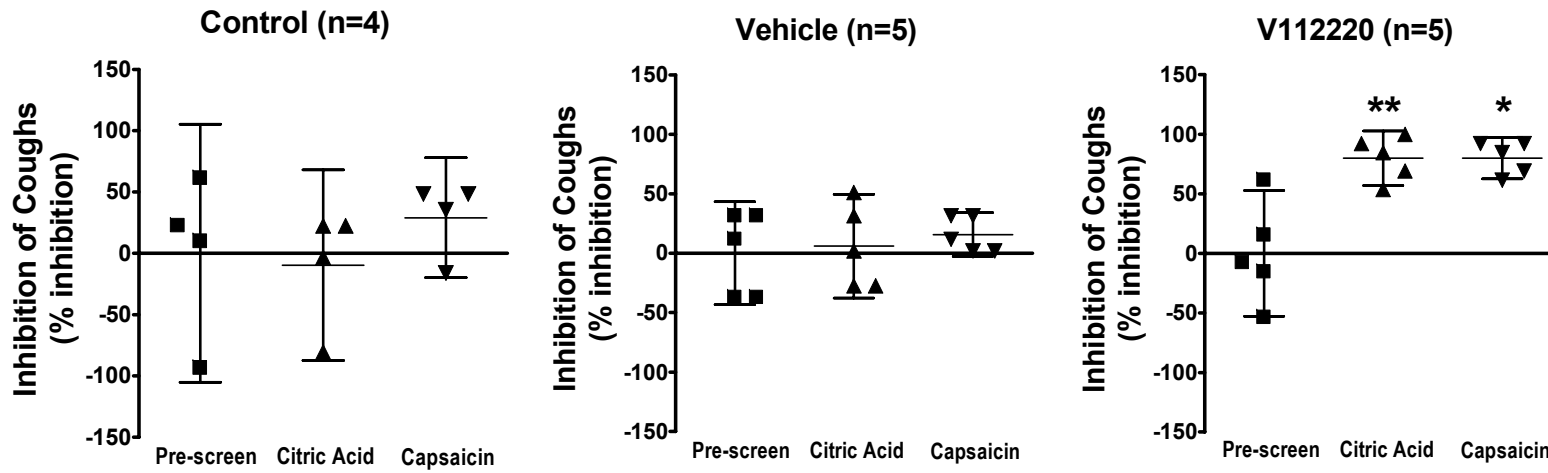

Supplement: MOESM3 [file 9623148]
